# Supplementary material
Source: PubMed Central journal article supplement (PMC6469506)
Supplement: NIHMS1012366-supplement-Supplemental.pdf [file NIHMS1012366-supplement-Supplemental.pdf]

## Supporting Information

### A Bone-Seeking *Trans*-Cyclooctene for Pretargeting and Bioorthogonal Chemistry:

### A Proof of Concept Study Using $^{99m}\text{Tc}$ - and $^{177}\text{Lu}$ -Labeled Tetrazines.

#### Authors

Abdolreza Yazdani, Holly Bilton, Alyssa Vito, Afaf R. Genady, Stephanie M. Rathmann, Zainab Ahmad, Nancy Janzen, Shannon Czorny, Brian M. Zeglis, Lynn C. Francesconi, John F. Valliant

#### Table of Contents

| Item(s)                                                                                                                                   | Page(s) |
|-------------------------------------------------------------------------------------------------------------------------------------------|---------|
| 1. $^1\text{H}$ NMR, $^{13}\text{C}$ NMR and HSQC of TCO-BP ( <b>2</b> )                                                                  | S2-S3   |
| 2. UV HPLC trace and $^{31}\text{P}\{^1\text{H}\}$ NMR spectrum of <b>2</b>                                                               | S4      |
| 3. HRMS (TOF-MS) of <b>2</b>                                                                                                              | S5      |
| 4. Method for UV/Vis kinetic studies of tetrazine reaction with <b>2</b>                                                                  | S6      |
| 5. Data plots and $K_{\text{obs}}$ calculation for kinetic study of tetrazine reaction with <b>2</b>                                      | S7      |
| 6. RadioTLC for $^{99m}\text{TcO}_4^-$ , [ $^{99m}\text{Tc}$ ]-TCO-BP ( <b>3</b> ) and a co-spot; $\text{H}_2\text{O}$ vs. acetone eluent | S8      |
| 7. Stability of <b>3</b> in saline and plasma, determined by RadioTLC with acetone as the eluent                                          | S9      |
| 8. Stability of <b>3</b> in plasma, determined by RadioTLC with $\text{H}_2\text{O}$ as the eluent                                        | S10     |
| 9. Biodistribution data for <b>3</b> .                                                                                                    | S11     |
| 10. HPLC traces of [ $^{177}\text{Lu}$ ]-DOTA-Tz ( <b>5</b> ) before and after treatment with <b>2</b>                                    | S12     |
| 11. Biodistribution data for <b>5</b> with <b>2</b> using active and pretargeting strategies                                              | S13     |
| 12. $^1\text{H}$ NMR and $^{13}\text{C}$ NMR spectra of <b>6</b>                                                                          | S14     |
| 13. HRMS (TOF-MS) of <b>6</b>                                                                                                             | S15     |
| 14. UV HPLC trace of <b>6</b>                                                                                                             | S16     |
| 15. Biodistribution data for <b>7</b> with <b>2</b> using active targeting and pretargeting strategies (1 hour)                           | S17     |
| 16. Biodistribution data for <b>7</b> with <b>2</b> using pretargeting strategy (12 hour)                                                 | S18     |
| 17. Biodistribution data for <b>7</b>                                                                                                     | S19     |
| 18. $^1\text{H}$ NMR and $^{13}\text{C}$ NMR spectra of <b>8</b>                                                                          | S20     |
| 19. $^1\text{H}$ NMR and $^{13}\text{C}$ NMR spectra of <b>9</b>                                                                          | S21     |

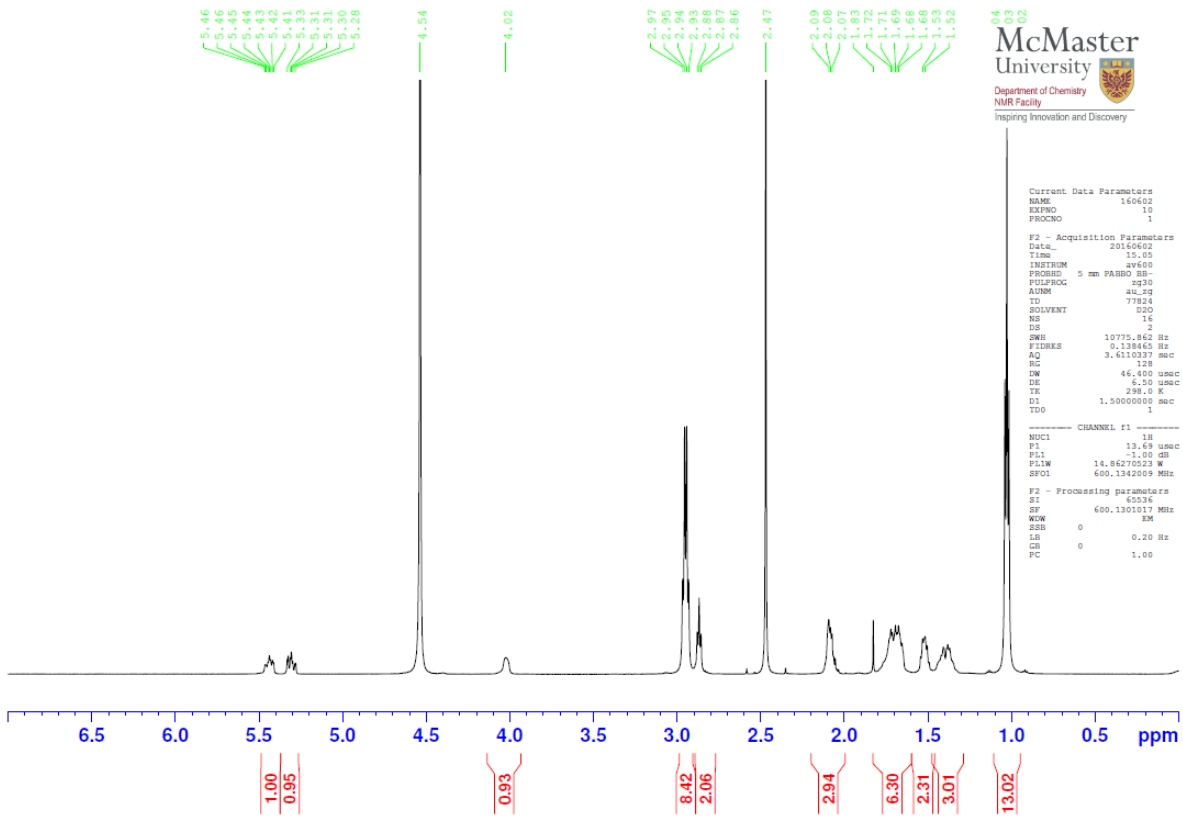

**Figure S1.**  $^1\text{H}$  NMR spectrum ( $\text{D}_2\text{O}$ , 600 MHz) of TCO-BP (**2**).

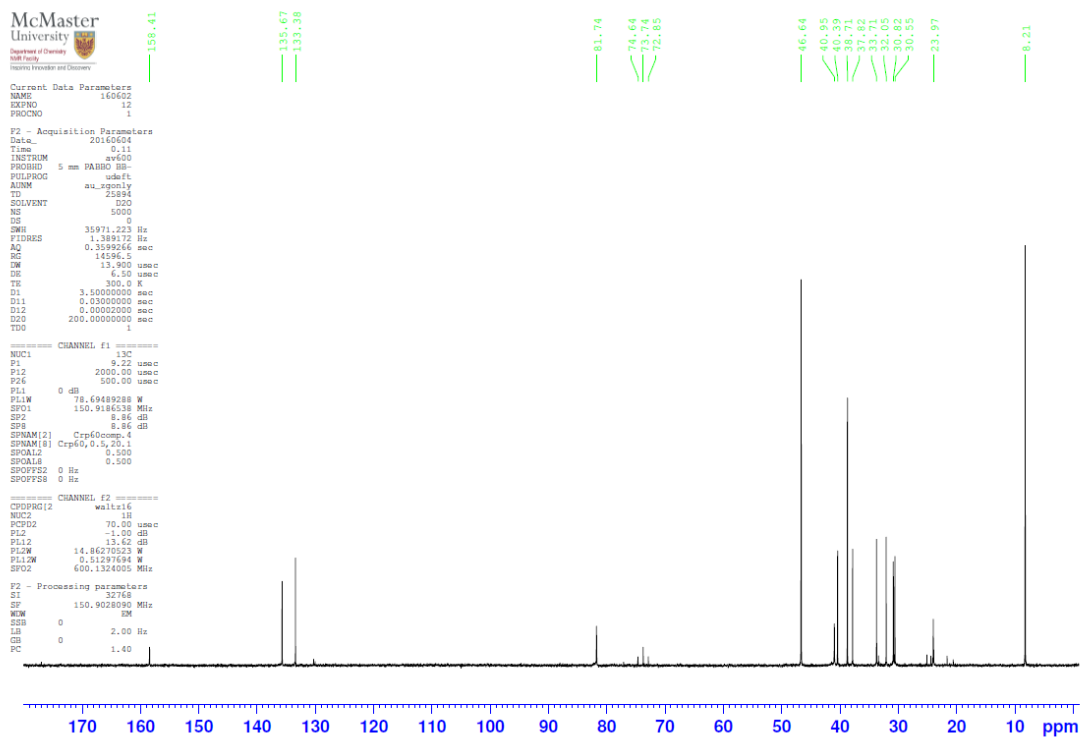

Figure S2.  $^{13}\text{C}$  NMR spectrum ( $\text{D}_2\text{O}$ , 150 MHz) of **2**.

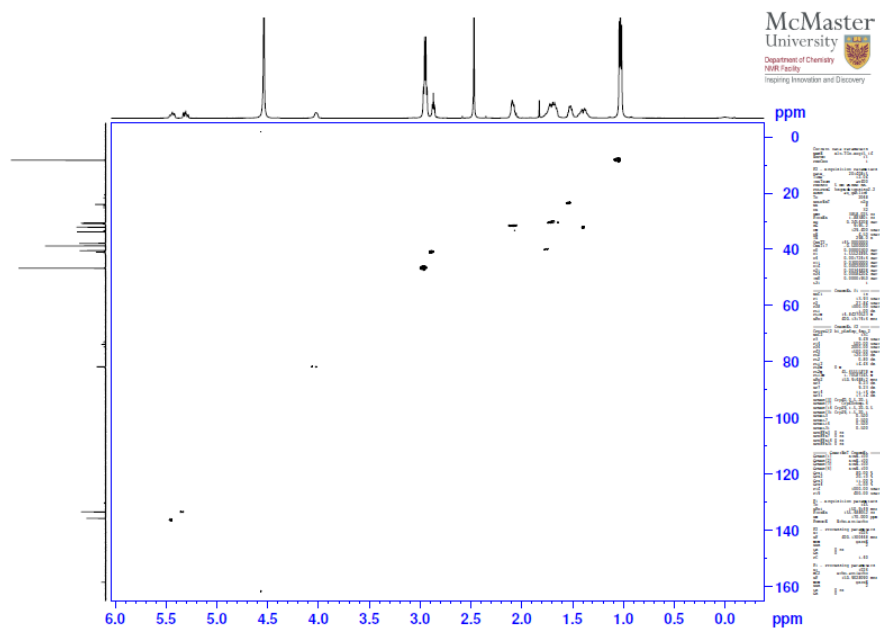

Figure S3. HSQC of **2** (600 MHz,  $\text{CDCl}_3$ ).

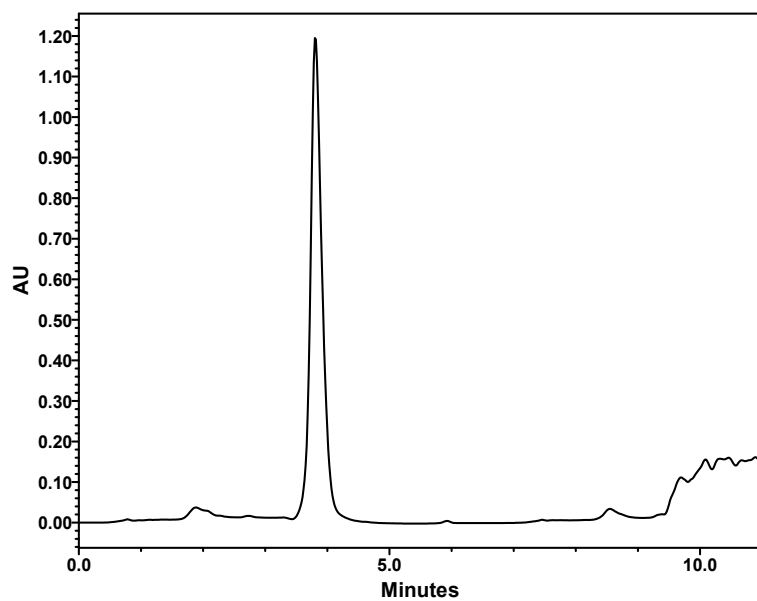

**Figure S4.** UV HPLC trace (UV 220 nm) of **2**.

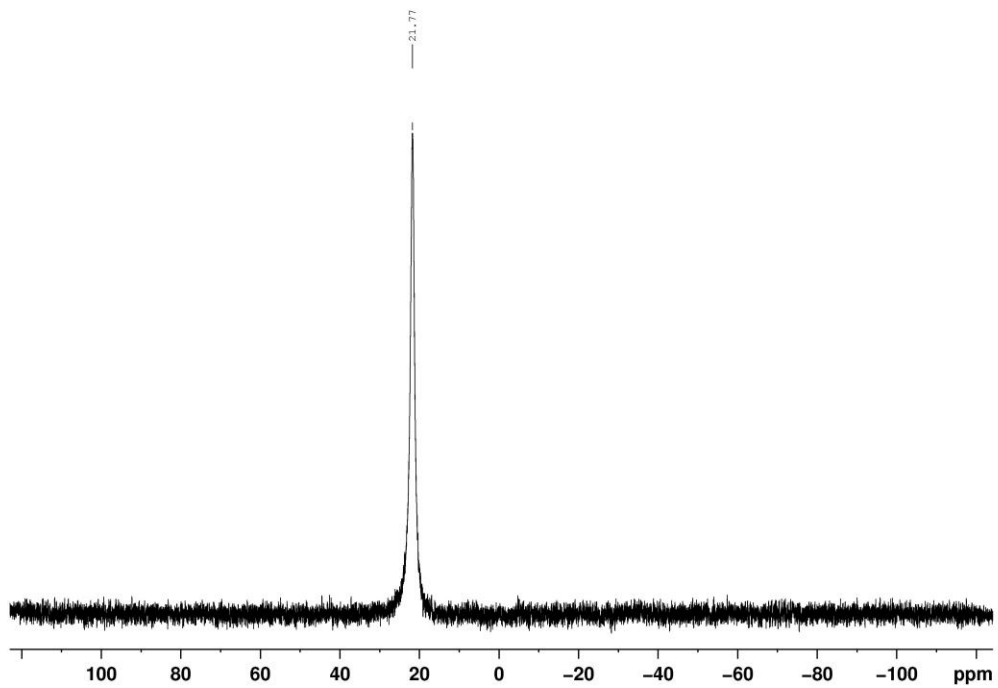

**Figure S5.**  $^{31}\text{P}\{^1\text{H}\}$  NMR spectrum ( $\text{D}_2\text{O}$ , 242 MHz) of **2**.

R179HP

JFV5B26120 (0.028) Is (0.10,0.01) C<sub>13</sub>H<sub>24</sub>NO<sub>9</sub>P<sub>2</sub>

03-May-2016

TOF MS ES-  
8.42e12

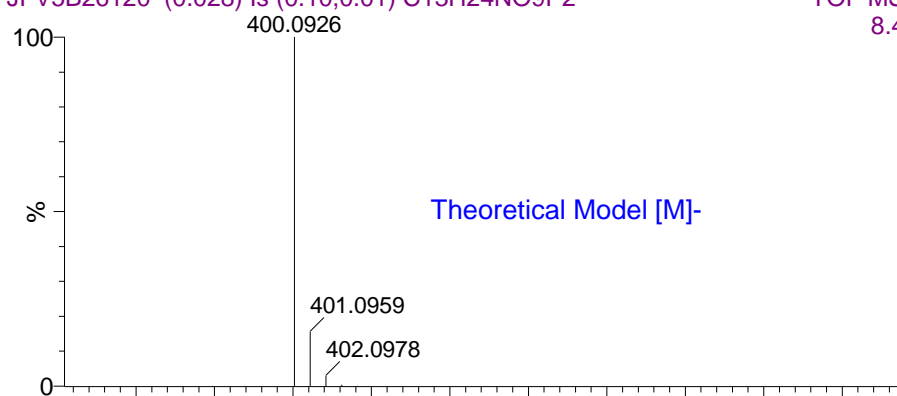

JFV5B26120 975 (18.464) AM (Cen,4, 80.00, Ar,6500.0,734.01,0.80); Sb (99,10.00 ); S  
6.11e4

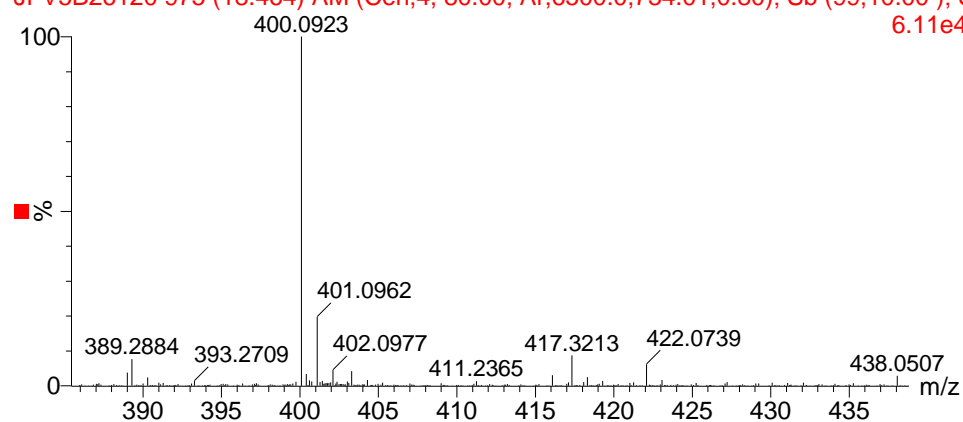

Figure S6. HRMS (TOF-MS) of 2.

## UV/Vis kinetic studies

The reaction between 4-(1,2,4,5-tetrazin-3-yl)phenylmethanamine hydrochloride and **2** was conducted at  $25 \pm 0.5$  °C in a 1-mL UV cuvette, and monitored by UV-Vis spectroscopy monitoring at 515 nm. The substrates were dissolved separately in 1:2 v/v MeOH-saline and spectra acquired every 0.1 seconds over one minute. The kinetics were measured in triplicate for three different concentrations of **2** ( $5.7 \times 10^{-3}$ ,  $7.0 \times 10^{-3}$ ,  $9.0 \times 10^{-3}$  M) against the tetrazine ( $0.5 \times 10^{-3}$  M). The  $K_{\text{obs}}$ , for each run was determined from a plot of absorbance versus time (Graphpad Prism 5). The average  $K_{\text{obs}}$  obtained from experiments was determined in triplicate and plotted against the concentration of **2** to determine the second order rate constant.

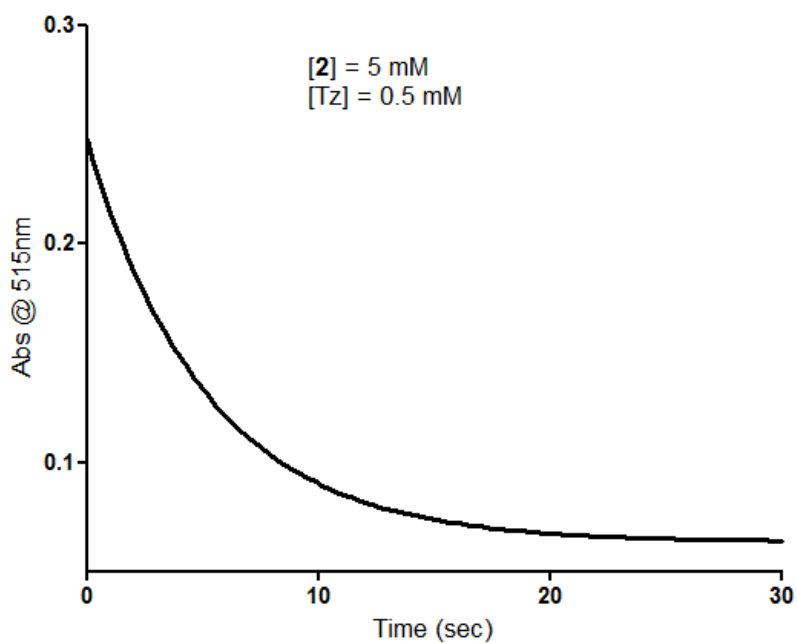

**Figure S7.** Plot of absorption at 515 nm versus time for the reaction of **2** with 4-(1,2,4,5-tetrazin-3-yl)phenyl)methanamine hydrochloride in 1:2 MeOH/saline.

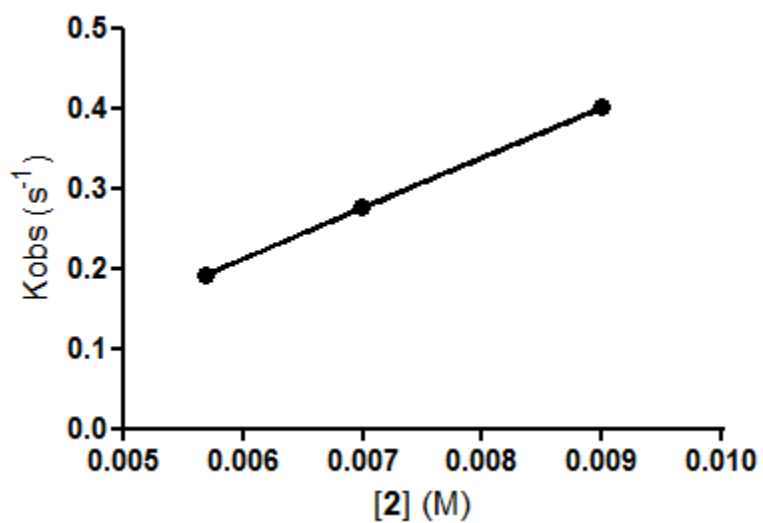

**Figure S8.** Plot of  $K_{obs}$  vs. the concentration of TCO-BP **2**.

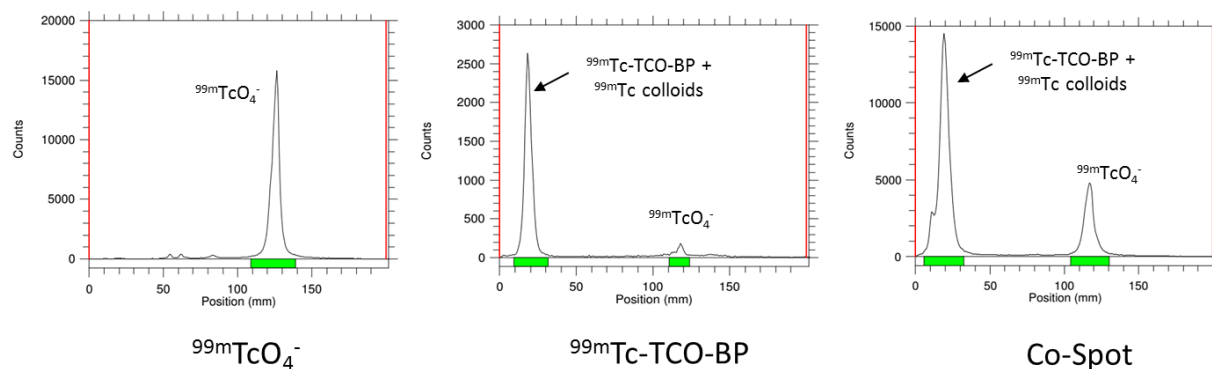

**Figure S9.** RadioTLC of  $^{99m}\text{TcO}_4^-$ , [ $^{99m}\text{Tc}$ ]-TCO-BP (**3**) and a co-spot using acetone as the eluent. In acetone, both **3** and  $^{99m}\text{Tc}$  colloidal impurities remain on the baseline, while  $^{99m}\text{TcO}_4^-$  travels with the solvent front. TLC were performed using iTLC-SG glass microfiber chromatography paper (Agilent Technologies, SGI0001) plates and visualized on a Bioscan AR-2000 Imaging Scanner.

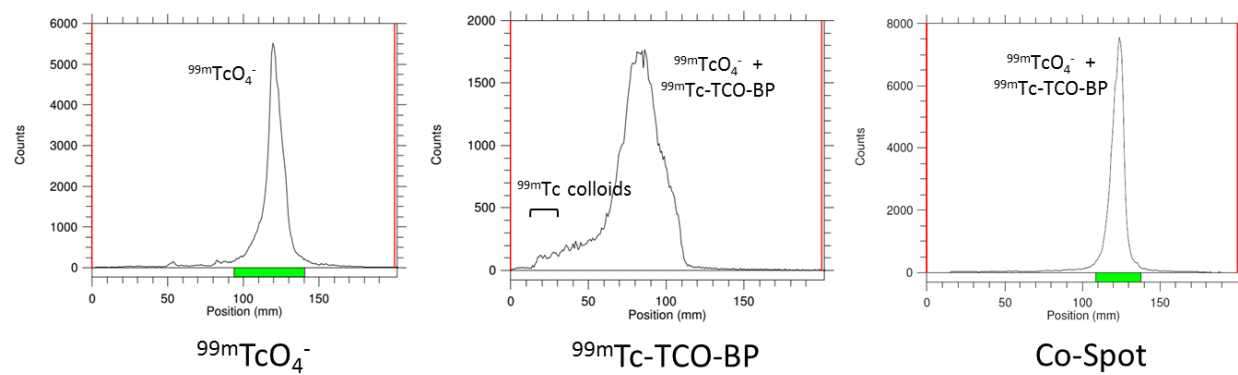

**Figure S10.** RadioTLC of  $^{99m}\text{TcO}_4^-$ , [ $^{99m}\text{Tc}$ ]-TCO-BP (**3**) and a co-spot using distilled water as the eluent. In distilled water,  $^{99m}\text{TcO}_4^-$  and [ $^{99m}\text{Tc}$ ]-TCO-BP (**3**) travel with the solvent front, while  $^{99m}\text{Tc}$  colloidal impurities remain on the baseline. TLCs were performed using iTLC-SG glass microfiber chromatography paper (Agilent Technologies, SGI0001) plates and visualized on a Bioscan AR-2000 Imaging Scanner.



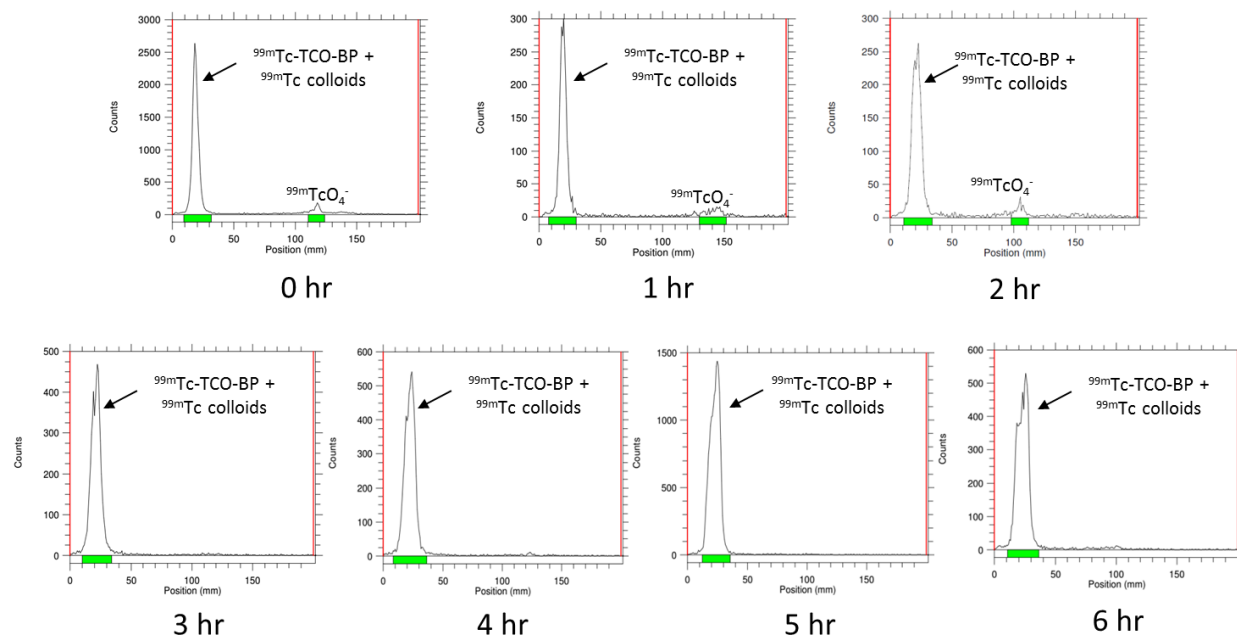

**Figure S11.** Stability of  $[^{99m}\text{Tc}]\text{-TCO-BP (3)}$  in saline at  $37\text{ }^\circ\text{C}$  at the indicated time points, as assessed by Radio-TLC with acetone as the eluent. TLCs were performed using iTLC-SG glass microfiber chromatography paper (Agilent Technologies, SGI0001) plates and visualized on a Bioscan AR-2000 Imaging Scanner.

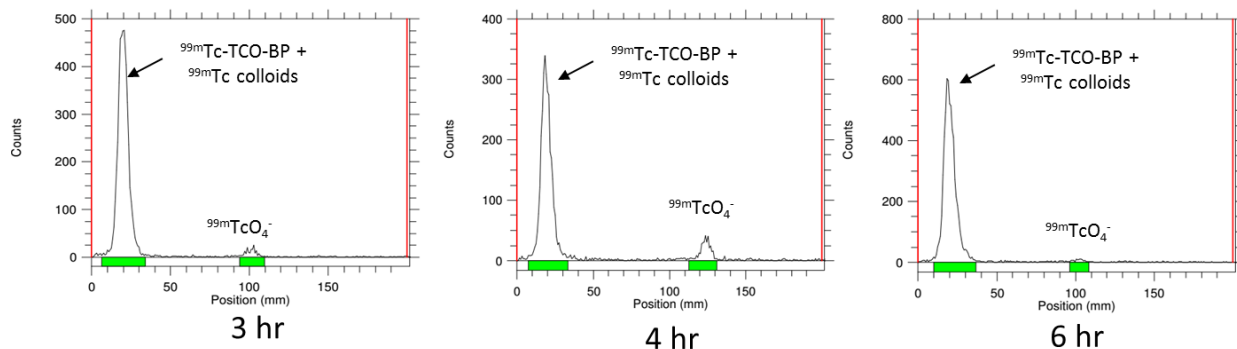

**Figure S12.** Stability of  $[^{99m}\text{Tc}]\text{-TCO-BP (3)}$  in plasma at  $37\text{ }^\circ\text{C}$  at the indicated time points, as assessed by Radio-TLC with acetone as the eluent. TLCs were performed using iTLC-SG glass microfiber chromatography paper (Agilent Technologies, SGI0001) plates and visualized on a Bioscan AR-2000 Imaging Scanner.

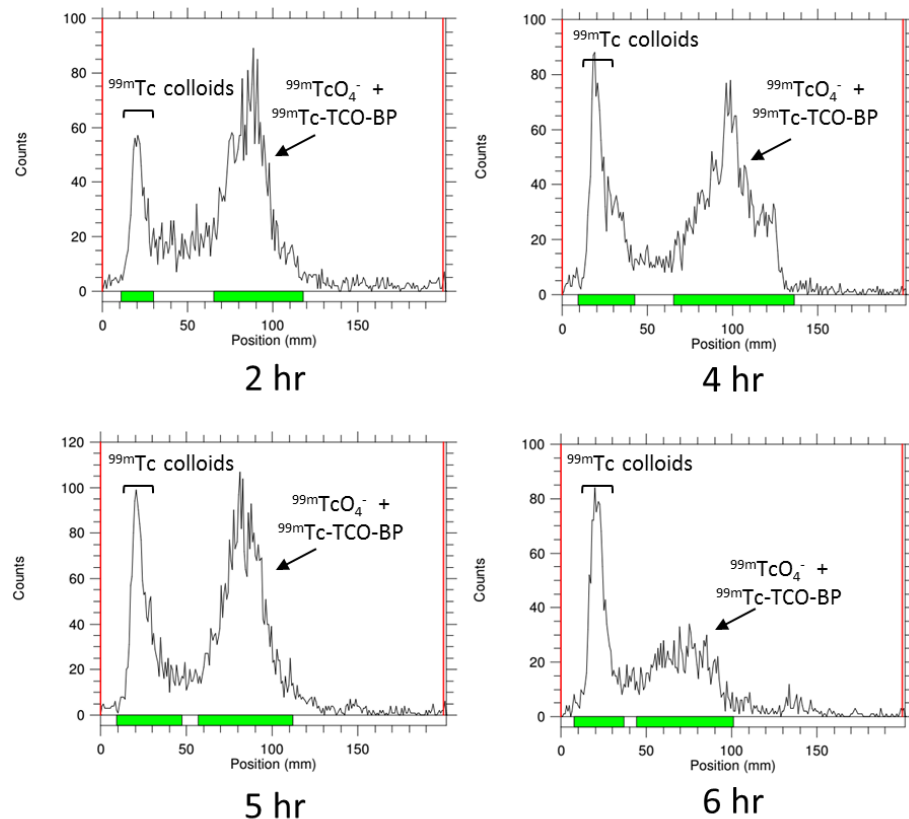

**Figure S13.** Stability of [<sup>99m</sup>Tc]-TCO-BP (**3**) in plasma at 37 °C at the indicated time points, as assessed by Radio-TLC with distilled water as the eluent. A broad peak (arrow) indicates co-migration of <sup>99m</sup>Tc with **3**, whereas <sup>99m</sup>Tc colloidal impurities accumulate at the baseline. TLCs were performed using iTLC-SG glass microfiber chromatography paper (Agilent Technologies, SGI0001) plates and visualized on a Bioscan AR-2000 Imaging Scanner.

| %ID/g                 | n=3    |       | n=3    |        | n=3   |       |
|-----------------------|--------|-------|--------|--------|-------|-------|
|                       | 1h     |       | 4h     |        | 6h    |       |
| Organs                | avg    | SEM   | avg    | SEM    | avg   | SEM   |
| Blood                 | 0.78   | 0.05  | 0.06   | 0.02   | 0.03  | 0.00  |
| Adipose               | 0.36   | 0.19  | 0.15   | 0.07   | 0.08  | 0.01  |
| Adrenals              | 3.14   | 0.59  | 0.91   | 0.36   | 1.21  | 0.16  |
| Bone (arm + shoulder) | 8.56   | 0.35  | 6.55   | 1.08   | 7.77  | 0.20  |
| Bone (leg + knee)     | 14.29  | 0.51  | 12.36  | 0.48   | 12.49 | 0.29  |
| Brain                 | 0.03   | 0.00  | 0.03   | 0.02   | 0.02  | 0.00  |
| Gall Bladder          | 1.59   | 0.59  | 0.96   | 0.38   | 1.43  | 0.34  |
| Heart                 | 1.04   | 0.12  | 0.29   | 0.13   | 0.46  | 0.03  |
| Kidneys               | 42.54  | 1.60  | 22.10  | 5.75   | 35.46 | 1.86  |
| Lg Intestine + Caecum | 0.26   | 0.03  | 2.35   | 1.86   | 1.04  | 0.05  |
| Liver                 | 6.52   | 0.54  | 1.99   | 1.25   | 3.66  | 0.26  |
| Lungs                 | 11.02  | 3.57  | 12.10  | 6.46   | 18.22 | 3.08  |
| Pancreas              | 1.09   | 0.12  | 0.19   | 0.11   | 0.30  | 0.08  |
| Skeletal Muscle       | 0.28   | 0.03  | 0.18   | 0.08   | 0.12  | 0.05  |
| Sm Intestine          | 0.80   | 0.13  | 0.31   | 0.08   | 0.27  | 0.05  |
| Spleen                | 3.36   | 0.48  | 2.14   | 0.94   | 3.36  | 0.43  |
| Stomach               | 3.30   | 0.50  | 1.25   | 0.38   | 1.09  | 0.16  |
| Thyroid/Trachea       | 2.80   | 0.22  | 2.05   | 0.24   | 2.24  | 0.37  |
| Urine + Bladder       | 231.61 | 86.63 | 281.35 | 102.89 | 68.20 | 51.21 |

**Table S1.** Biodistribution data for **3** expressed as percent injected dose per gram (%ID/g) and percent injected dose per organ (%ID/g). Data were taken at the indicated timepoints and studies were performed in Balb/c mice.

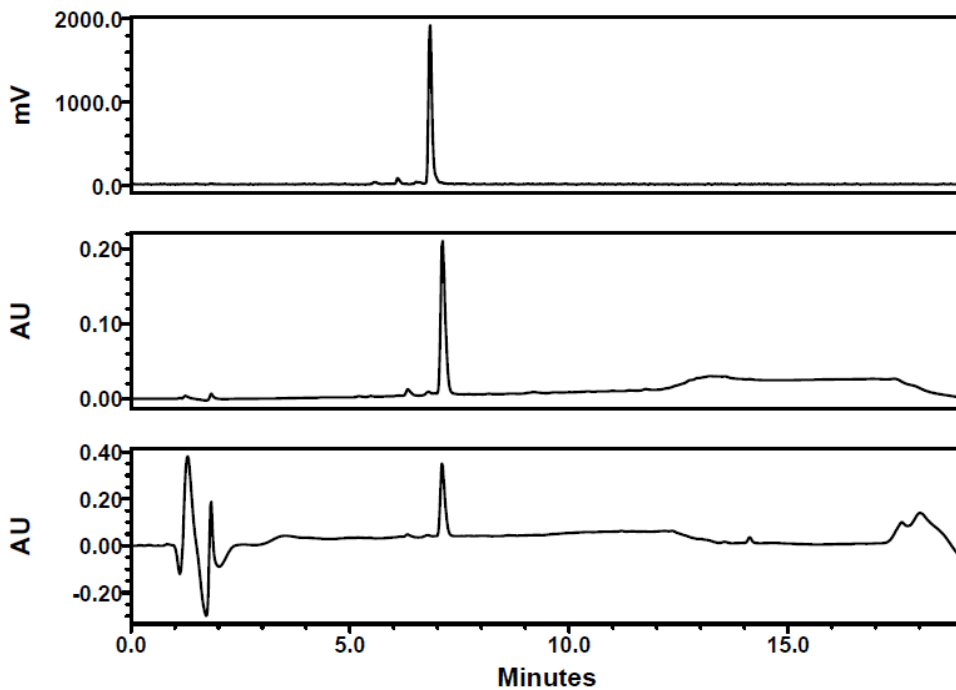

**Figure S14.** HPLC trace of  $^{177}\text{Lu}$ -Tz (**5**). Top: gamma; middle: UV 254 nm; bottom: UV 214 nm.

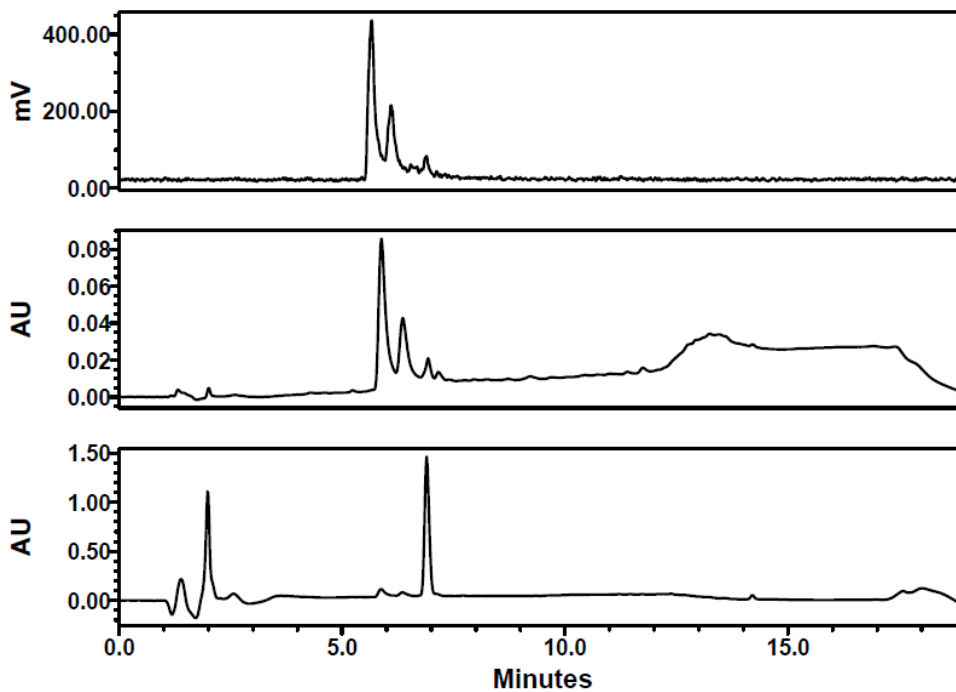

**Figure S15.** HPLC trace of  $^{177}\text{Lu}$ -Tz (**5**) following treatment with TCO-BP (**2**). Top: gamma; middle: UV 254 nm; bottom: UV 214 nm.

| %ID/g             | n=3          |      | n=3              |      |
|-------------------|--------------|------|------------------|------|
|                   | Pretargeting |      | Active targeting |      |
| Organs            | avg          | avg  | avg              | SEM  |
| Blood             | 0.79         | 0.33 | 0.07             | 0.00 |
| Gall Bladder      | 1.38         | 0.69 | 1.63             | 0.79 |
| Kidneys           | 2.44         | 0.10 | 2.09             | 0.07 |
| Knee              | 15.50        | 1.24 | 16.45            | 2.27 |
| Liver             | 1.99         | 0.73 | 0.52             | 0.01 |
| Shoulder          | 9.10         | 0.76 | 8.39             | 1.83 |
| Sm & Lg Intestine | 0.31         | 0.00 | 0.41             | 0.12 |
| Stomach           | 0.25         | 0.02 | 0.12             | 0.02 |
| Thyroid/Trachea   | 1.24         | 0.07 | 1.55             | 0.17 |

| %ID/O             | n=3          |      | n=3              |      |
|-------------------|--------------|------|------------------|------|
|                   | Pretargeting |      | Active targeting |      |
| Organs            | avg          | avg  | avg              | avg  |
| Blood             | 0.62         | 0.25 | 0.06             | 0.00 |
| Gall Bladder      | 0.02         | 0.01 | 0.01             | 0.00 |
| Kidneys           | 0.50         | 0.01 | 0.43             | 0.01 |
| Knee              | 27.82        | 3.40 | 29.88            | 4.11 |
| Liver             | 1.65         | 0.58 | 0.40             | 0.01 |
| Shoulder          | 16.34        | 2.05 | 15.14            | 3.18 |
| Sm & Lg Intestine | 0.38         | 0.01 | 0.55             | 0.15 |
| Stomach           | 0.04         | 0.00 | 0.02             | 0.00 |
| Thyroid/Trachea   | 0.02         | 0.00 | 0.02             | 0.00 |

**Table S2.** Biodistribution data expressed as (Top) percent injected dose per gram (%ID/g) and (Bottom) percent injected dose per organ (%ID/O) for **5**, when combined with **2** prior to injection (Active targeting) or following injection of **2**, 1 h prior to administration of **5** (Pretargeting). Data were taken at 6 h post-injection of the labeled compound and studies were performed in Balb/c mice.

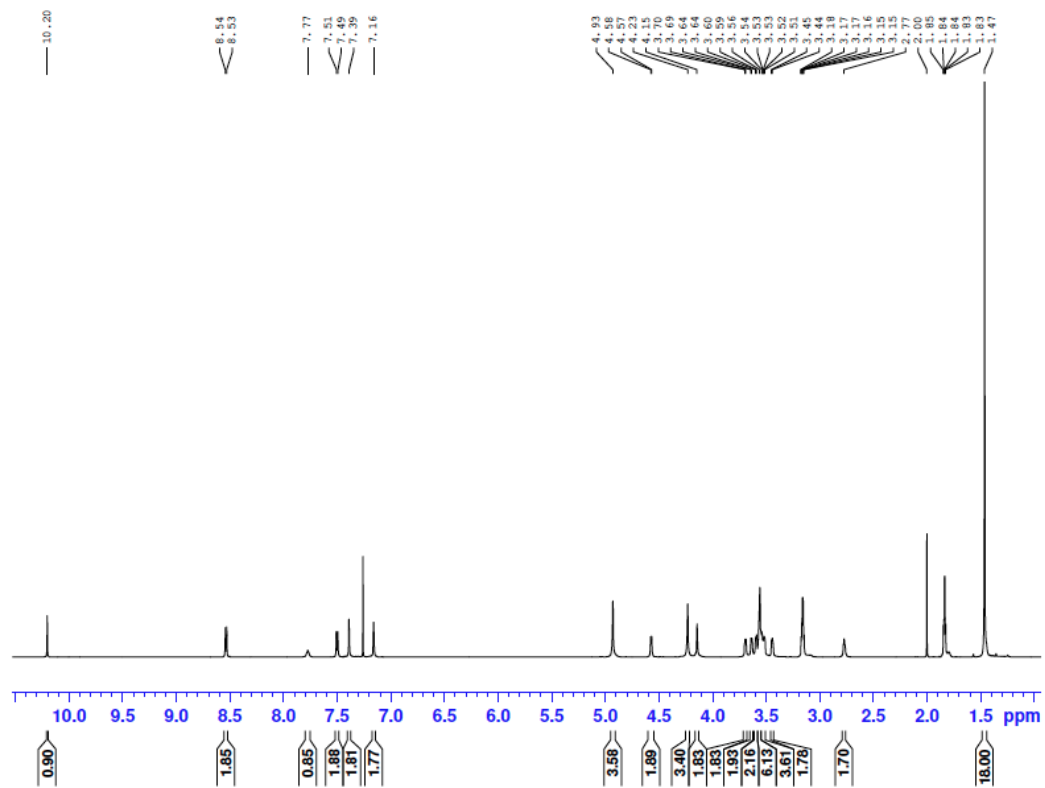

Figure S16.  $^1\text{H}$  NMR (600 MHz,  $\text{CDCl}_3$ ) of **6**.

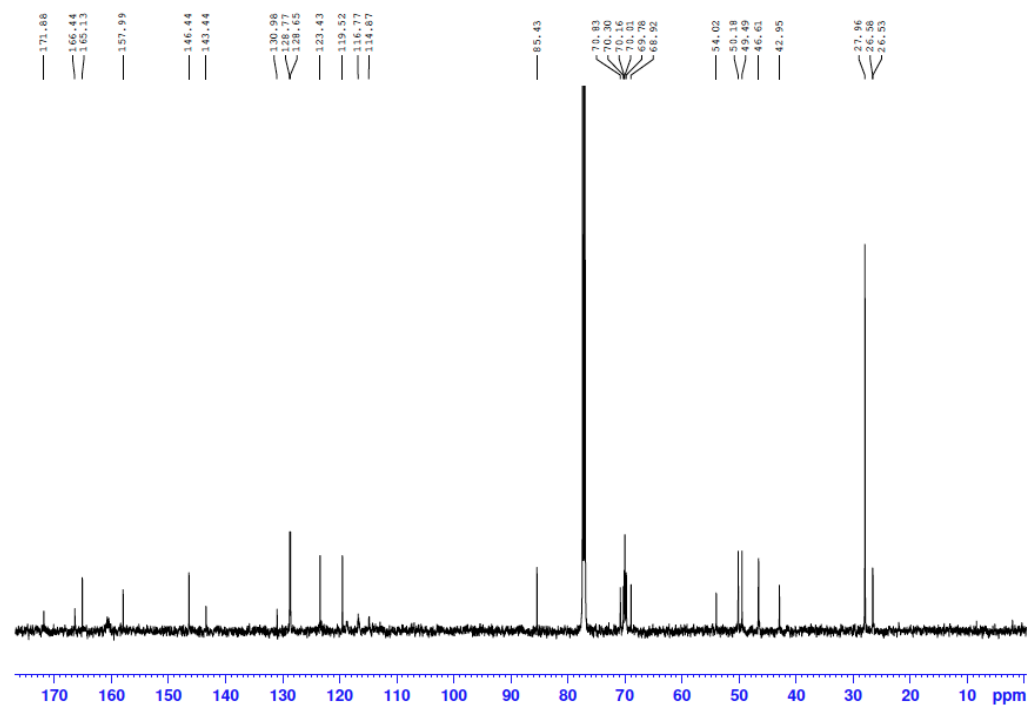

Figure S17.  $^{13}\text{C}$  NMR (150 MHz,  $\text{CDCl}_3$ ) of **6**.

**PEG5-TZ**

JFVB26122A (0.028) Is (0.10,0.01) C<sub>41</sub>H<sub>60</sub>N<sub>10</sub>O<sub>10</sub>H

**03-May-2016**

TOF MS ES+  
5.93e12

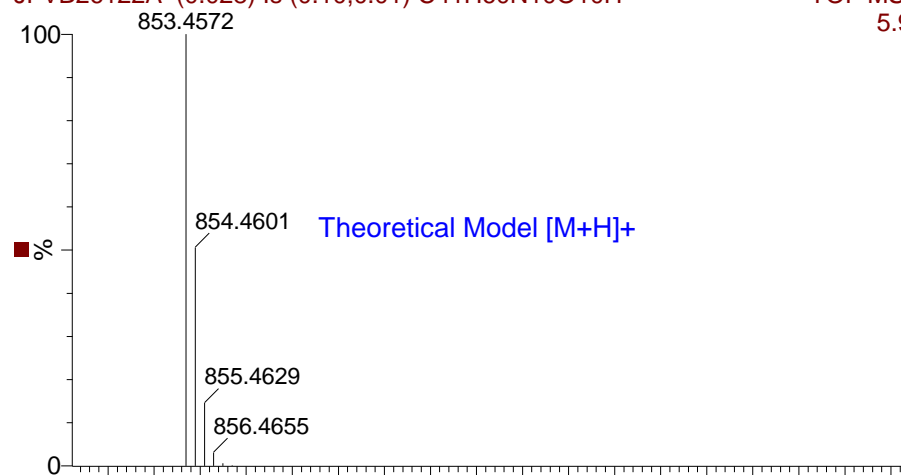

JFVB26122A 362 (6.852) AM (Cen,4, 80.00, Ar,6500.0,922.01,0.80); Sb (99,10.00) ; S  
2.38e4

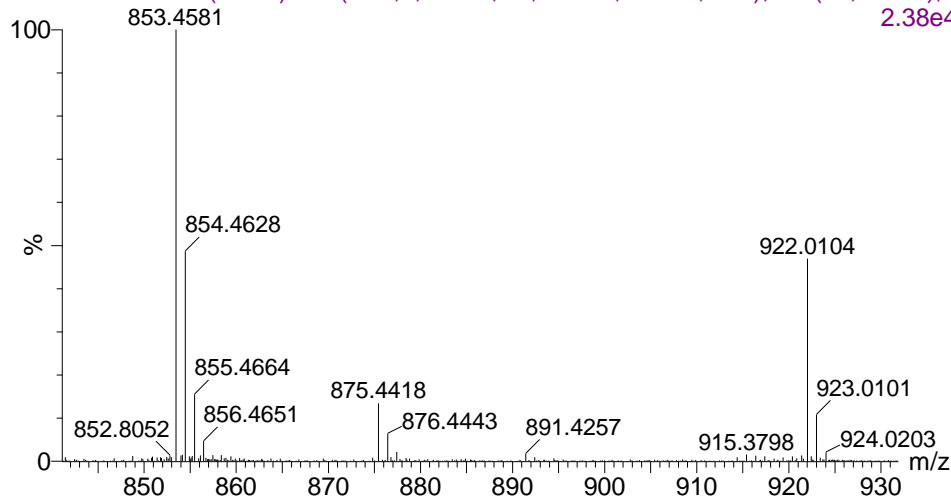

Elemental Composition Report

Single Mass Analysis

Tolerance = 5.0 PPM / DBE: min = -1.5, max = 300.0

Isotope cluster parameters: Separation = 1.0 Abundance = 1.0%

| Min/Max Mass | Calc. Mass | mDa  | PPM  | DBE  | Score | Formula                                                         |
|--------------|------------|------|------|------|-------|-----------------------------------------------------------------|
| 853.4581     | 853.4572   | 0.9  | 1.0  | 11.0 | 1     | C <sub>42</sub> H <sub>67</sub> N <sub>3</sub> O <sub>15</sub>  |
|              | 853.4572   | 0.9  | 1.0  | 16.5 | 3     | C <sub>41</sub> H <sub>61</sub> N <sub>10</sub> O <sub>10</sub> |
|              | 853.4599   | -1.8 | -2.1 | 15.5 | 6     | C <sub>45</sub> H <sub>65</sub> N <sub>4</sub> O <sub>12</sub>  |
|              | 853.4559   | 2.2  | 2.6  | 11.5 | 2     | C <sub>40</sub> H <sub>65</sub> N <sub>6</sub> O <sub>14</sub>  |
|              | 853.4612   | -3.1 | -3.7 | 20.5 | 8     | C <sub>46</sub> H <sub>61</sub> N <sub>8</sub> O <sub>8</sub>   |
|              | 853.4612   | -3.1 | -3.7 | 15.0 | 7     | C <sub>47</sub> H <sub>67</sub> N <sub>10</sub> O <sub>13</sub> |
|              | 853.4545   | 3.6  | 4.2  | 12.0 | 4     | C <sub>38</sub> H <sub>63</sub> N <sub>9</sub> O <sub>13</sub>  |

**Figure S18.** HRMS (TOF-MS) of **6**.

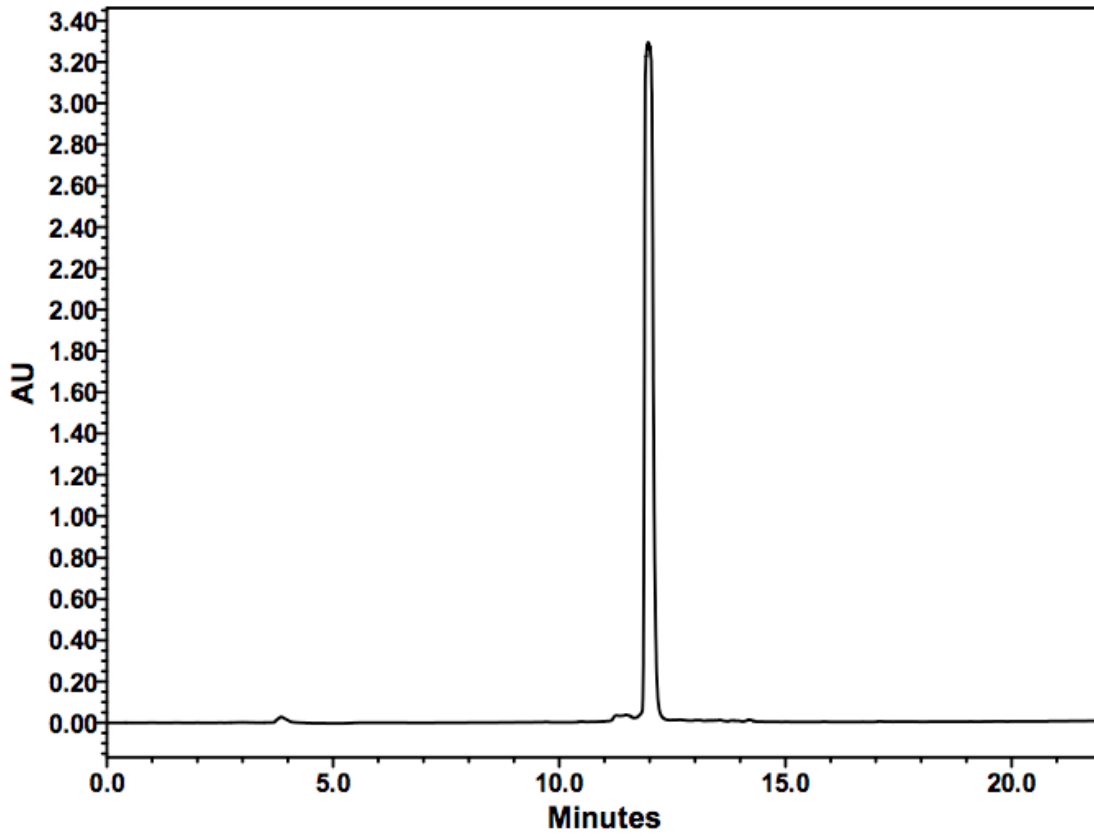

**Figure S19.** UV HPLC trace of **6** (UV 254 nm).



| %ID/g             | n=3          |       | n=3              |       |
|-------------------|--------------|-------|------------------|-------|
|                   | Pretargeting |       | Active targeting |       |
| Organs            | avg          | SEM   | avg              | SEM   |
| Blood             | 0.77         | 0.07  | 0.82             | 0.05  |
| Gall Bladder      | 91.46        | 17.09 | 44.96            | 21.84 |
| Kidneys           | 12.33        | 0.74  | 12.56            | 0.45  |
| Knee              | 20.07        | 4.91  | 21.48            | 4.82  |
| Liver             | 1.85         | 0.17  | 1.82             | 0.12  |
| Shoulder          | 16.16        | 4.84  | 15.95            | 5.16  |
| Sm & Lg Intestine | 8.26         | 0.58  | 11.00            | 1.42  |
| Stomach           | 1.12         | 0.30  | 3.88             | 1.47  |
| Thyroid/Trachea   | 2.45         | 0.83  | 1.50             | 0.04  |

| %ID/O             | n=3       |      | n=3              |      |
|-------------------|-----------|------|------------------|------|
|                   | Pretarget |      | Active targeting |      |
| Organs            | avg       | SEM  | avg              | SEM  |
| Blood             | 0.61      | 0.05 | 0.72             | 0.06 |
| Gall Bladder      | 0.39      | 0.20 | 0.29             | 0.14 |
| Kidneys           | 2.37      | 0.15 | 2.75             | 0.14 |
| Knee              | 34.95     | 8.21 | 39.99            | 7.97 |
| Liver             | 1.49      | 0.09 | 1.74             | 0.04 |
| Shoulder          | 27.91     | 8.05 | 29.83            | 9.06 |
| Sm & Lg Intestine | 9.52      | 0.39 | 15.63            | 0.96 |
| Stomach           | 0.22      | 0.02 | 0.79             | 0.25 |
| Thyroid/Trachea   | 0.02      | 0.00 | 0.02             | 0.00 |

**Table S3.** Biodistribution data expressed as (top) percent injected dose per gram (%ID/g) and (bottom) percent injected dose per organ (%ID/O) for **7** when combined with **2** prior to injection (Active targeting) or following injection of **2**, 1 h prior to administration of **7** (Pretargeting). Data were taken at 6 h post-injection of the labeled compound and studies were performed in Balb/c mice.

| %ID/g<br>Organs   | n=3   |      |
|-------------------|-------|------|
|                   | avg   | SEM  |
| Blood             | 0.70  | 0.28 |
| Gall Bladder      | 32.52 | 7.33 |
| Kidneys           | 16.09 | 6.99 |
| Knee              | 9.55  | 1.88 |
| Liver             | 1.35  | 0.45 |
| Shoulder          | 6.98  | 2.38 |
| Sm & Lg Intestine | 8.96  | 1.87 |
| Stomach           | 0.21  | 0.04 |
| Thyroid/Trachea   | 1.64  | 0.38 |

| %ID/O<br>Organs   | n=3   |      |
|-------------------|-------|------|
|                   | avg   | SEM  |
| Blood             | 0.78  | 0.32 |
| Gall Bladder      | 0.32  | 0.12 |
| Kidneys           | 4.72  | 2.18 |
| Knee              | 22.81 | 4.64 |
| Liver             | 1.54  | 0.65 |
| Shoulder          | 16.87 | 6.03 |
| Sm & Lg Intestine | 12.01 | 2.18 |
| Stomach           | 0.08  | 0.02 |
| Thyroid/Trachea   | 0.02  | 0.00 |

**Table S4.** Biodistribution data expressed as (top) percent injected dose per gram (%ID/g) and (bottom) percent injected dose per organ (%ID/O) for pretargeting with injection of **2**, 12 h prior to administration of **7**. Data were taken at 6 h post-injection of the labeled compound and studies were performed in Balb/c mice.

| %ID/g                 | n=3     |        | n=3    |        |
|-----------------------|---------|--------|--------|--------|
|                       | 30 min  |        | 60 min |        |
| Organs                | avg     | SEM    | avg    | SEM    |
| Blood                 | 1.03    | 0.07   | 0.76   | 0.05   |
| Adipose               | 0.05    | 0.00   | 0.16   | 0.12   |
| Adrenals              | 6.61    | 6.36   | 0.32   | 0.12   |
| Bone                  | 0.14    | 0.01   | 0.11   | 0.01   |
| Brain                 | 0.03    | 0.00   | 0.04   | 0.02   |
| Gall Bladder          | 1061.52 | 319.89 | 398.67 | 141.73 |
| Heart                 | 0.20    | 0.01   | 0.16   | 0.01   |
| Kidneys               | 0.55    | 0.06   | 0.49   | 0.04   |
| Lg Intestine + Caecum | 0.05    | 0.01   | 1.27   | 1.22   |
| Liver                 | 1.22    | 0.21   | 1.05   | 0.21   |
| Lungs                 | 0.75    | 0.05   | 0.76   | 0.06   |
| Pancreas              | 0.11    | 0.03   | 0.20   | 0.11   |
| Skeletal Muscle       | 0.08    | 0.02   | 0.07   | 0.01   |
| Sm Intestine          | 39.65   | 3.68   | 43.28  | 2.24   |
| Spleen                | 0.18    | 0.03   | 0.18   | 0.05   |
| Stomach               | 0.71    | 0.17   | 0.91   | 0.08   |
| Thyroid/Trachea       | 0.29    | 0.03   | 0.31   | 0.07   |
| Urine + Bladder       | 5.89    | 1.67   | 6.09   | 3.45   |

**Table S5.** Biodistribution data expressed as percent injected dose per gram (%ID/g) for **7** in Balb/c mice.

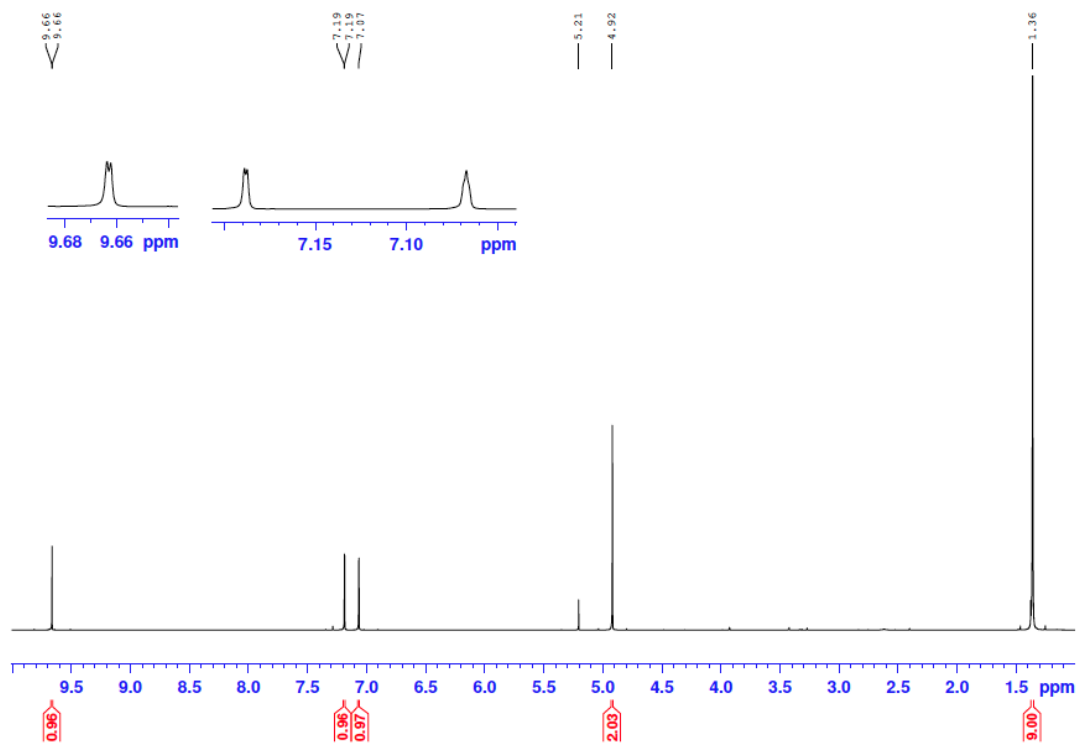

**Figure S20.**  $^1\text{H}$  NMR (600 MHz,  $\text{CDCl}_3$ ) of *tert*-butyl 2-(2-formyl-1*H*-imidazol-1-yl)acetate (**8**).

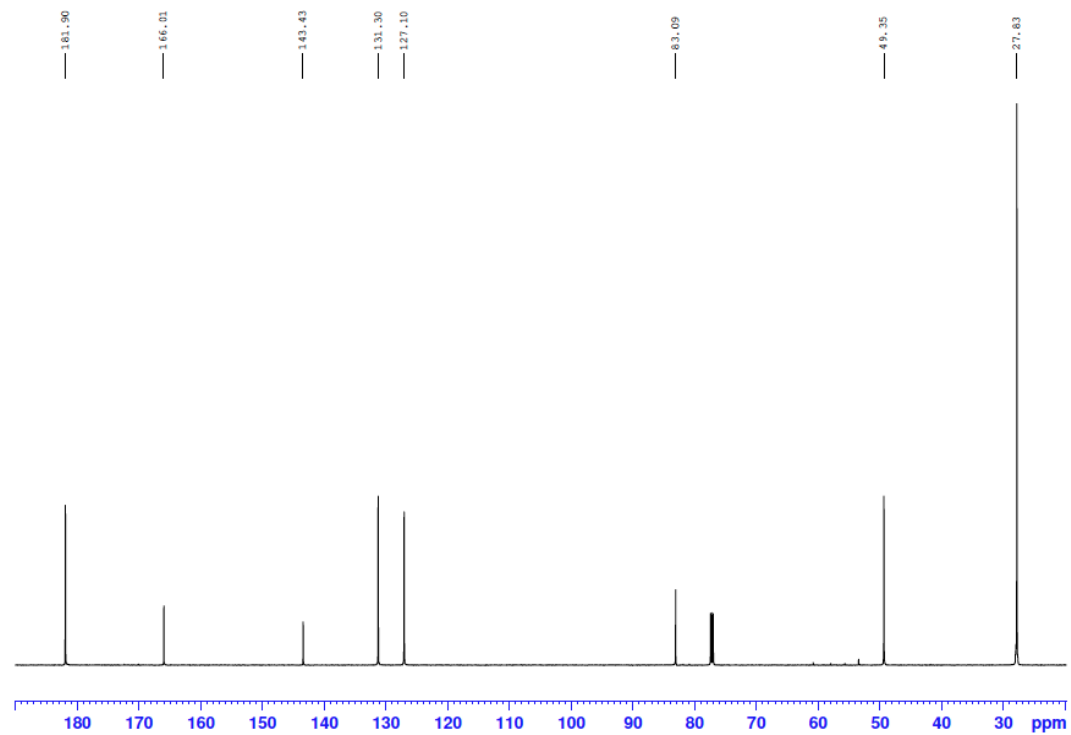

**Figure S21.**  $^{13}\text{C}$  NMR (150 MHz,  $\text{CDCl}_3$ ) of *tert*-butyl 2-(2-formyl-1*H*-imidazol-1-yl)acetate (**8**).

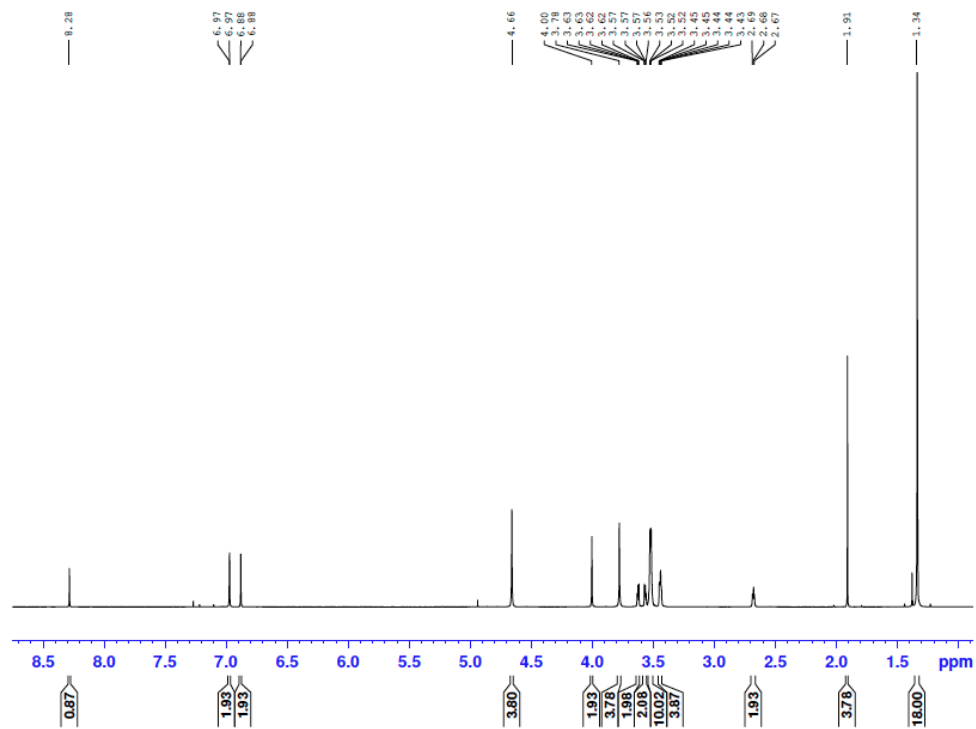

**Figure S22.**  $^1\text{H}$  NMR (600 MHz,  $\text{CDCl}_3$ ) of **9**.

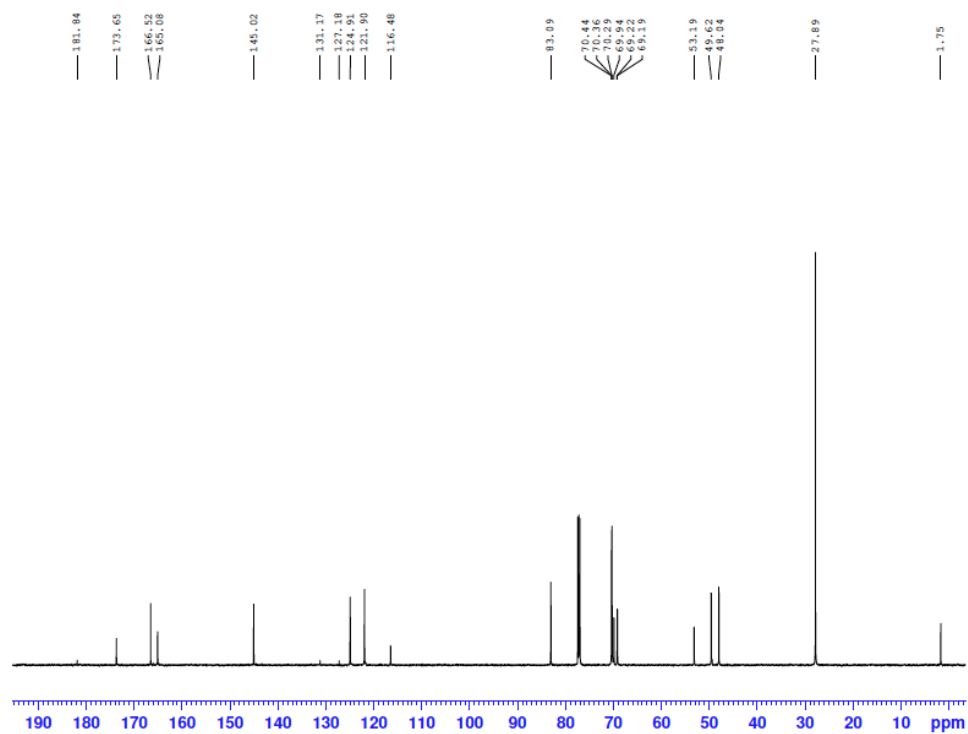

**Figure S23.**  $^{13}\text{C}$  NMR (150 MHz,  $\text{CDCl}_3$ ) of **9**.
